# Supplementary material for: CO2electroreduction performance of PtS2supported single transition metal atoms: a theoretical study
Source: Royal Society of Chemistry journal article supplement (doi:10.1039/d2cp04385h), 2023-01-01
Supplement: d2cp04385h1.pdf [file d2cp04385h1.pdf]

## *Supporting Information*

# **CO<sub>2</sub> Electroreduction Performance of PtS<sub>2</sub> Supported Single Transition Metal Atoms: A Theoretical Study**

Yu-wang Sun, Jing-yao Liu\*

*Institute of Theoretical Chemistry, College of Chemistry, Jilin University, Changchun*

*130023, People's Republic of China*

Submitted to: ***Phys. Chem. Chem. Phys.***

---

\*Corresponding author: Dr. Jing-yao Liu;

*E-mail* address: [l jy121@jlu.edu.cn](mailto:l jy121@jlu.edu.cn) (J.Y. Liu)

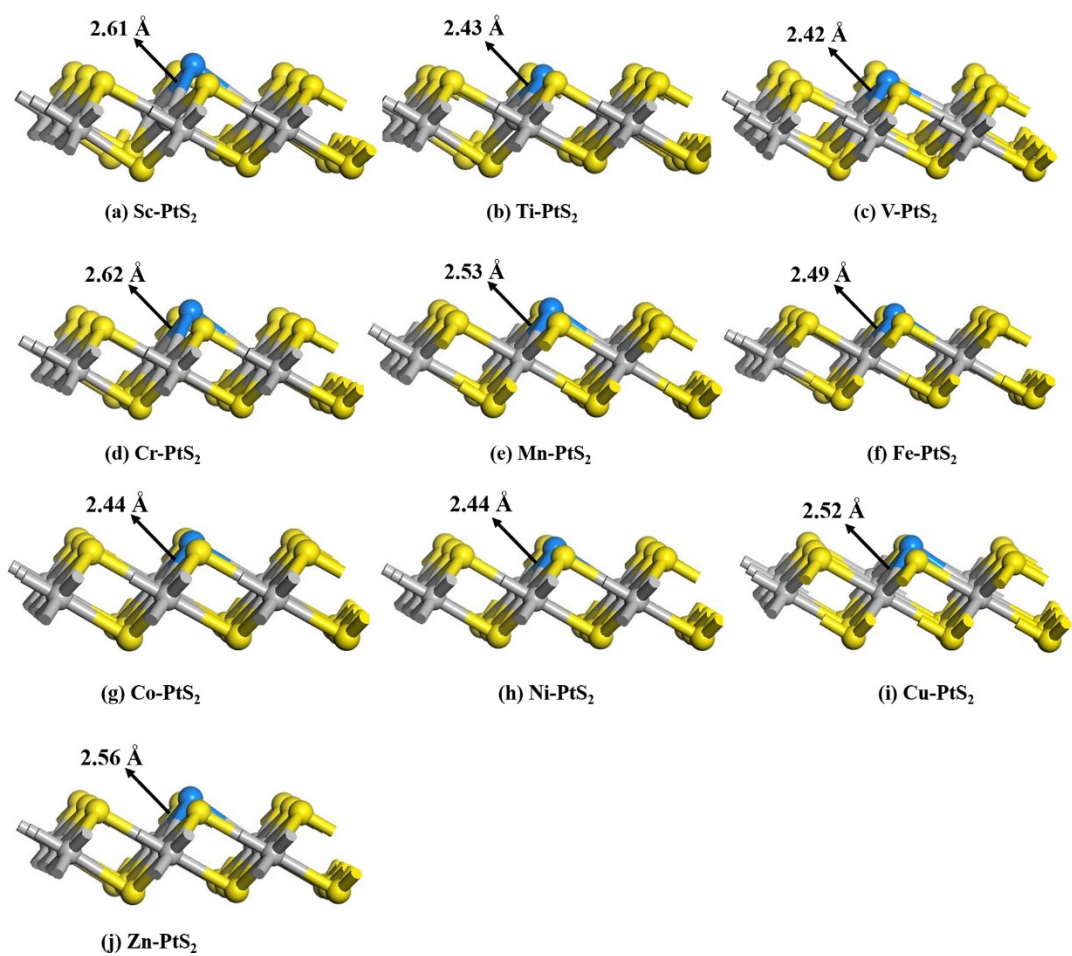

**Fig. S1** Optimized structure of single TM atom anchored to the S-vacancy in 1T-PtS<sub>2</sub>.

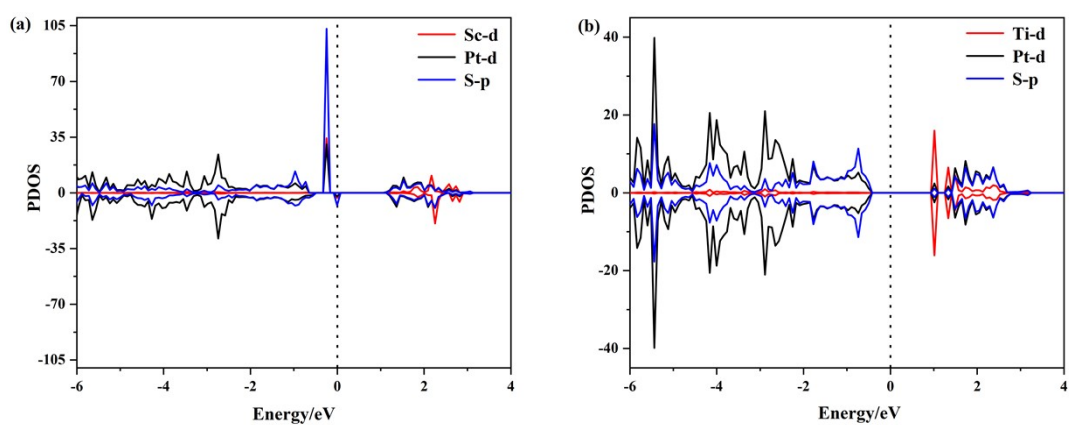

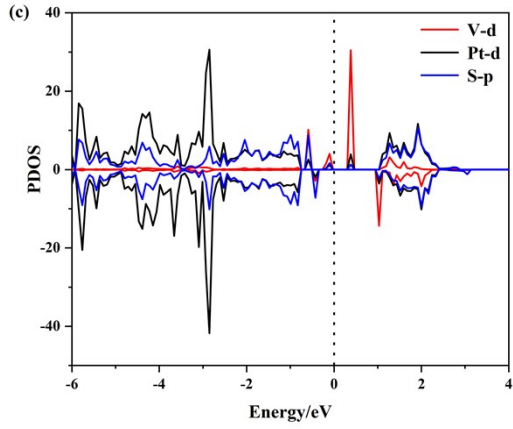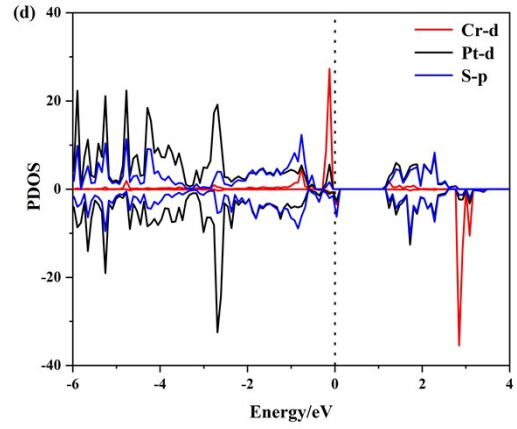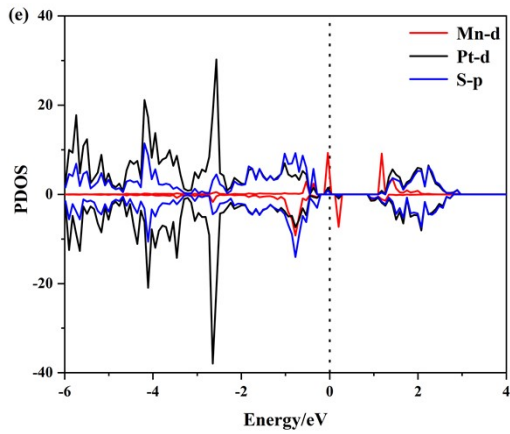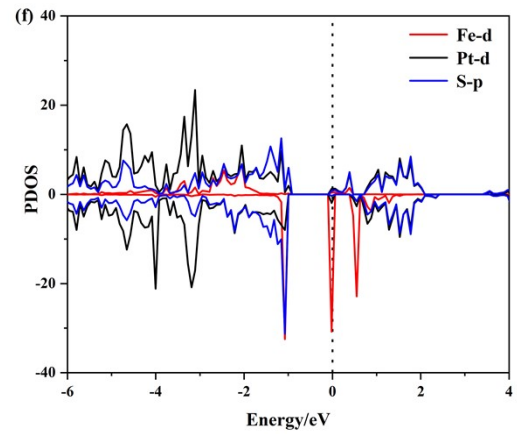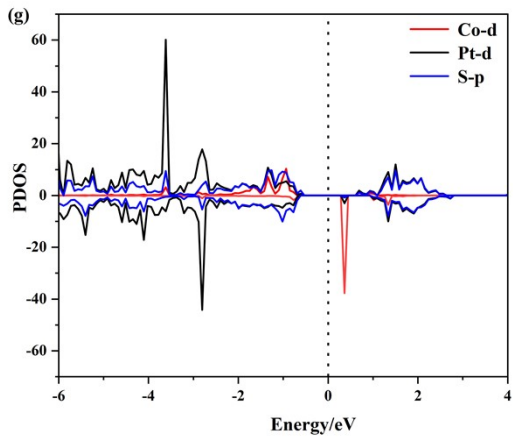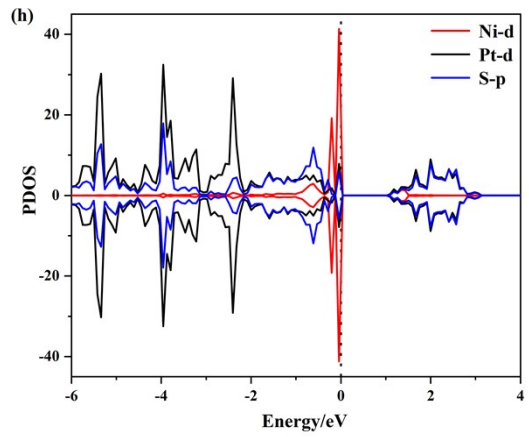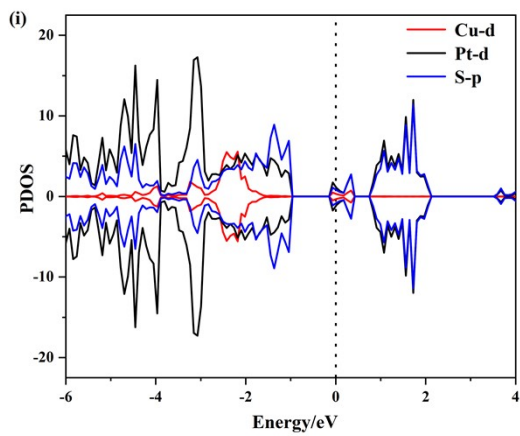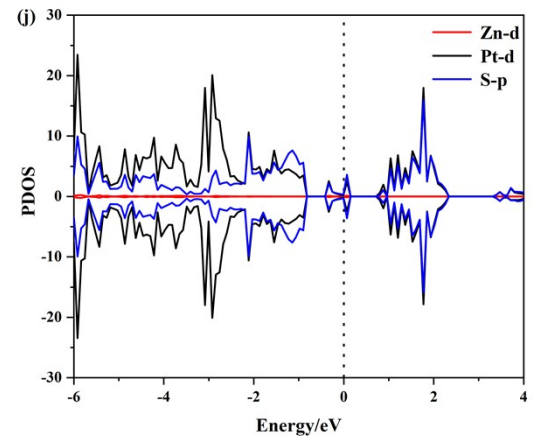

**Fig. S2** The partial density of states (PDOS) of TM-3d, Pt-5d and S-3p of TM-PtS<sub>2</sub>

**Table S1** Binding energies ( $E_b$ , eV) of the metal atom anchored on the S vacancy [ $E_b(\text{TM-PtS}_2)$ ] and surface of PtS<sub>2</sub> [ $E_b(\text{TM@PtS}_2\text{-Sv})$ ], and the formation energies ( $E_f$ , eV) of the single TM atom and two TM atoms.

| TM | $E_b(\text{TM-PtS}_2)$ | $E_b(\text{TM@PtS}_2\text{-Sv})$ | $E_f(\text{TM-PtS}_2)$ | $E_f(\text{TM}_2\text{-PtS}_2)$ |
|----|------------------------|----------------------------------|------------------------|---------------------------------|
| Sc | -6.22                  | -5.32                            | -1.60                  | -                               |
| Ti | -6.69                  | -5.05                            | -0.53                  | 0.66                            |
| V  | -5.06                  | -3.69                            | 0.87                   | 1.19                            |
| Cr | -6.56                  | -2.53                            | 0.87                   | 1.26                            |
| Mn | -4.17                  | -1.17                            | -0.69                  | 0.25                            |
| Fe | -4.46                  | -3.42                            | 1.10                   | 1.47                            |
| Co | -4.5                   | -3.34                            | 1.08                   | 1.48                            |
| Ni | -5.32                  | -3.96                            | 0.31                   | 0.98                            |
| Cu | -3.48                  | -2.46                            | 0.38                   | 1.78                            |
| Zn | -1.47                  | -0.43                            | -0.10                  | 0.04                            |

**Table S2** Formation energy  $E_f$  (in eV) and dissolution potential  $U_{diss}$  of TM-PtS<sub>2</sub> (in V).

| Catalysts                 | $E_f$ | $U_{diss}^0$ (metal) | $n$ | $U_{diss}$ |
|---------------------------|-------|----------------------|-----|------------|
| Sc-PtS <sub>2</sub>       | -1.6  | -2.08                | 3   | -1.55      |
| Ti-PtS <sub>2</sub>       | -0.53 | -1.63                | 2   | -1.37      |
| V-PtS <sub>2</sub>        | 0.87  | -1.18                | 2   | -1.62      |
| Cr-PtS <sub>2</sub>       | 0.87  | -0.91                | 2   | -1.34      |
| Mn-PtS <sub>2</sub>       | -0.69 | -1.19                | 2   | -0.85      |
| Fe-PtS <sub>2</sub>       | 1.10  | -0.45                | 2   | -1.00      |
| Co-PtS <sub>2</sub>       | 1.08  | -0.28                | 2   | -0.82      |
| Ni-PtS <sub>2</sub>       | 0.31  | -0.26                | 2   | -0.42      |
| Cu-PtS <sub>2</sub>       | 0.38  | 0.34                 | 2   | 0.15       |
| Zn-PtS <sub>2</sub>       | -0.1  | -0.76                | 2   | -0.71      |
| Fe@1T'-MoS <sub>2</sub> * | 2.72  | -0.45                | 2   | -1.81      |
| Co@1T'-MoS <sub>2</sub> * | 1.80  | -0.28                | 2   | -1.18      |
| Ni@1T'-MoS <sub>2</sub> * | 1.62  | -0.26                | 2   | -1.07      |

\* These are electrocatalysts that have been synthesized experimentally in Ref. 30.

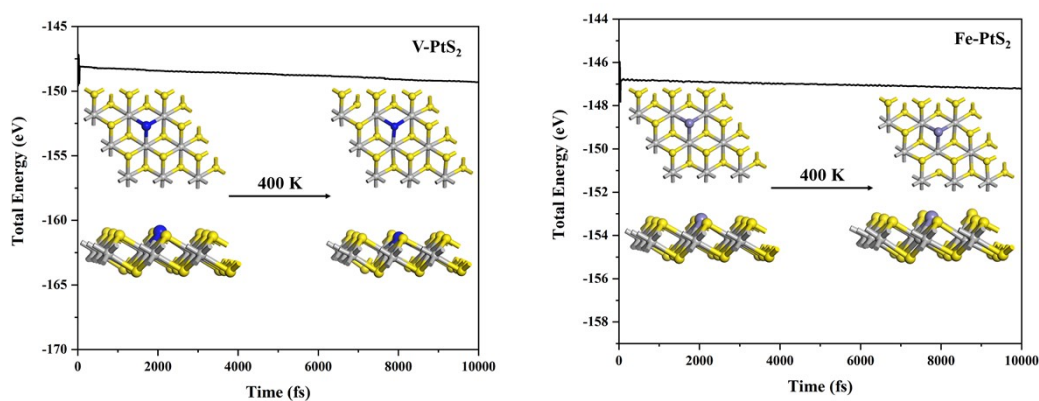

**Fig. S4** Variations of energy as a function of the time for AIMD simulations with the solvation model on V- and Fe-PtS<sub>2</sub>, and the insets show the corresponding geometry configurations for AIMD simulations at 0 ps and 10 ps

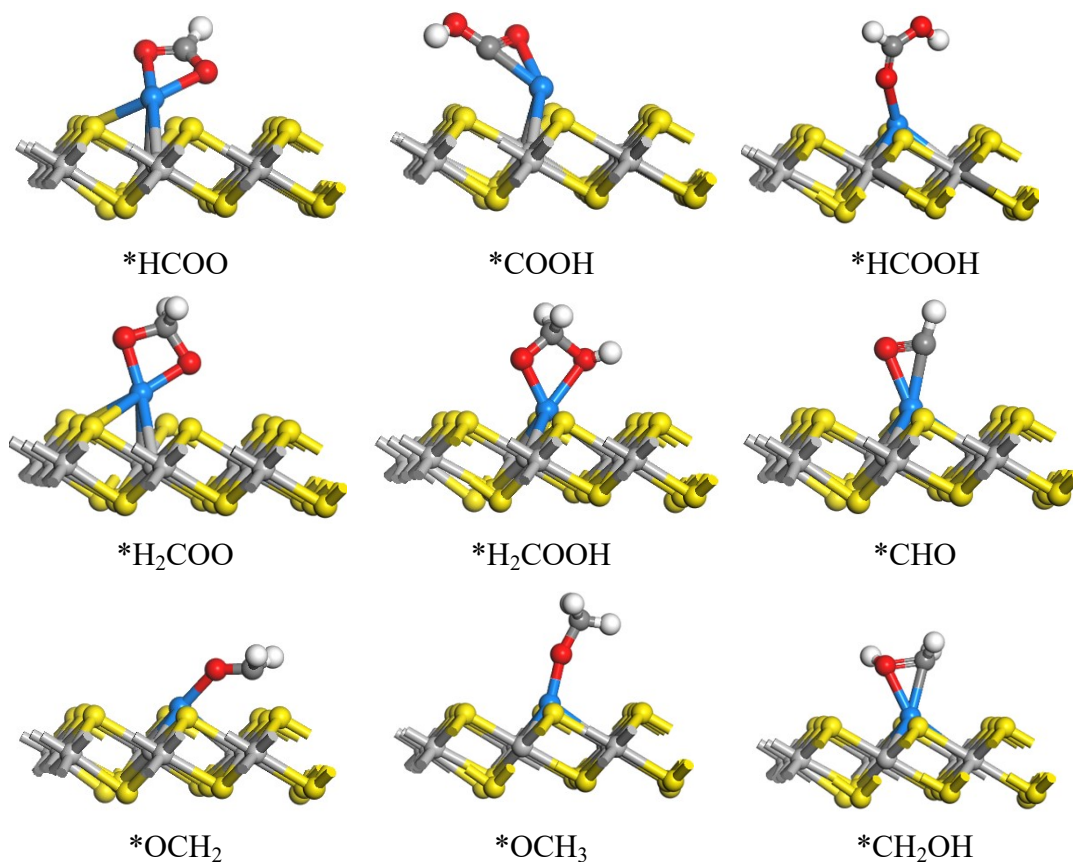

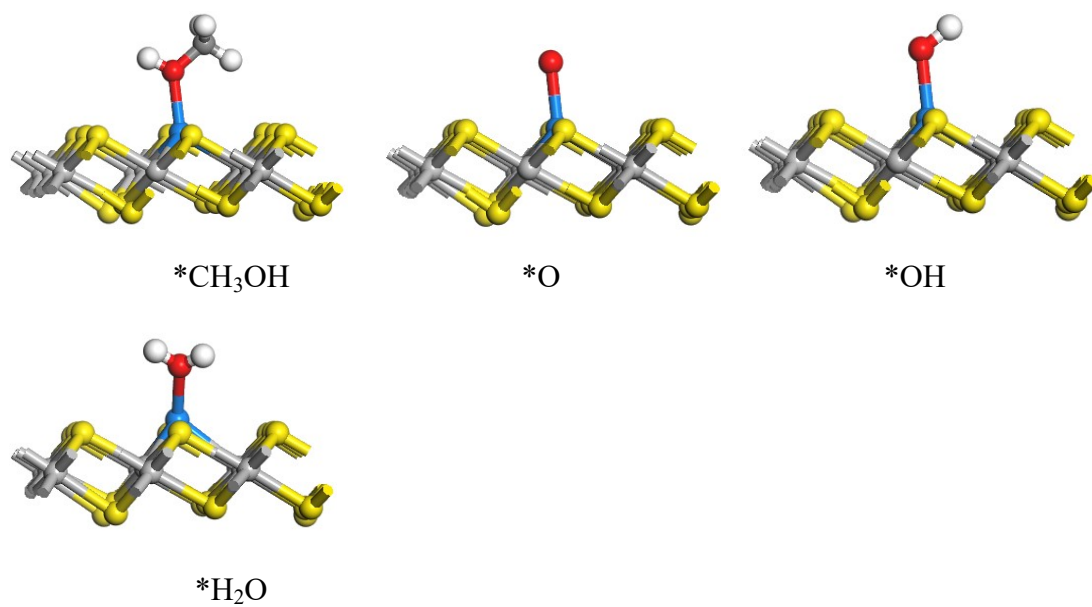

**Fig. S5** Optimized structures of the CO<sub>2</sub>RR involved intermediate species on Sc-PtS<sub>2</sub>.

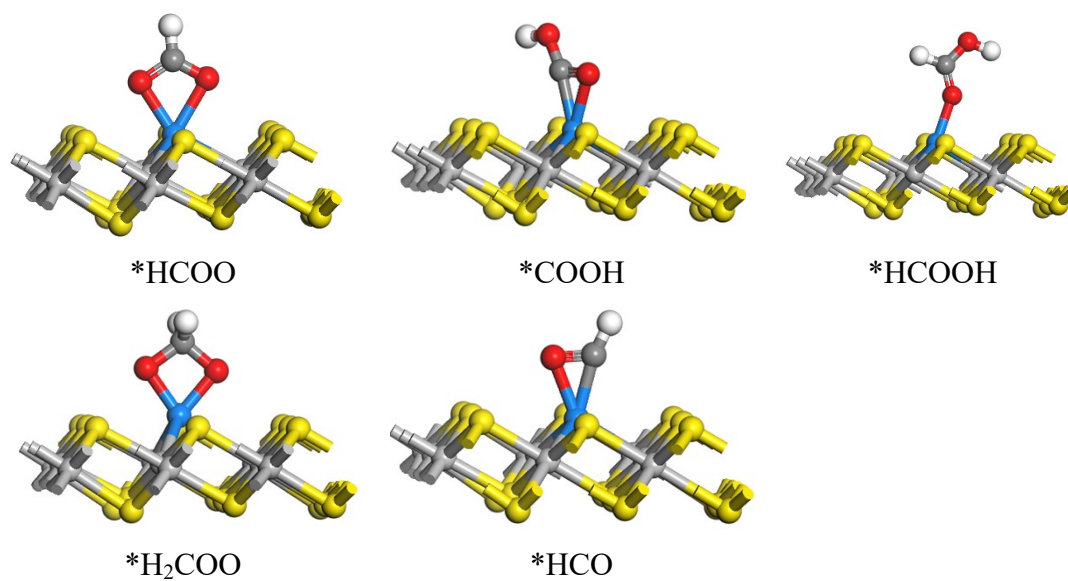

**Fig. S6** Optimized structures of the CO<sub>2</sub>RR involved intermediate species on Ti-PtS<sub>2</sub>.

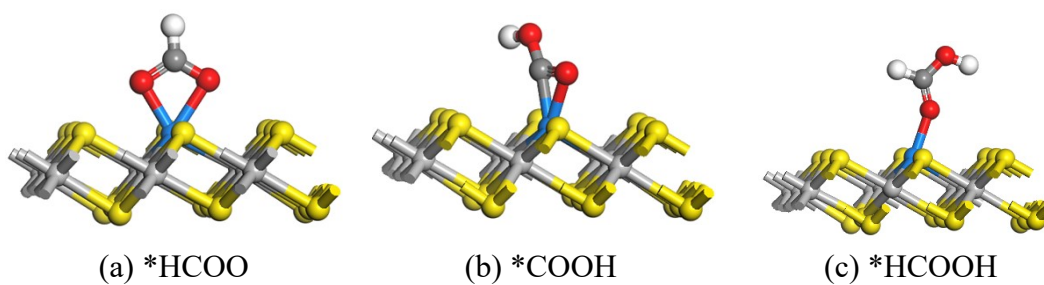



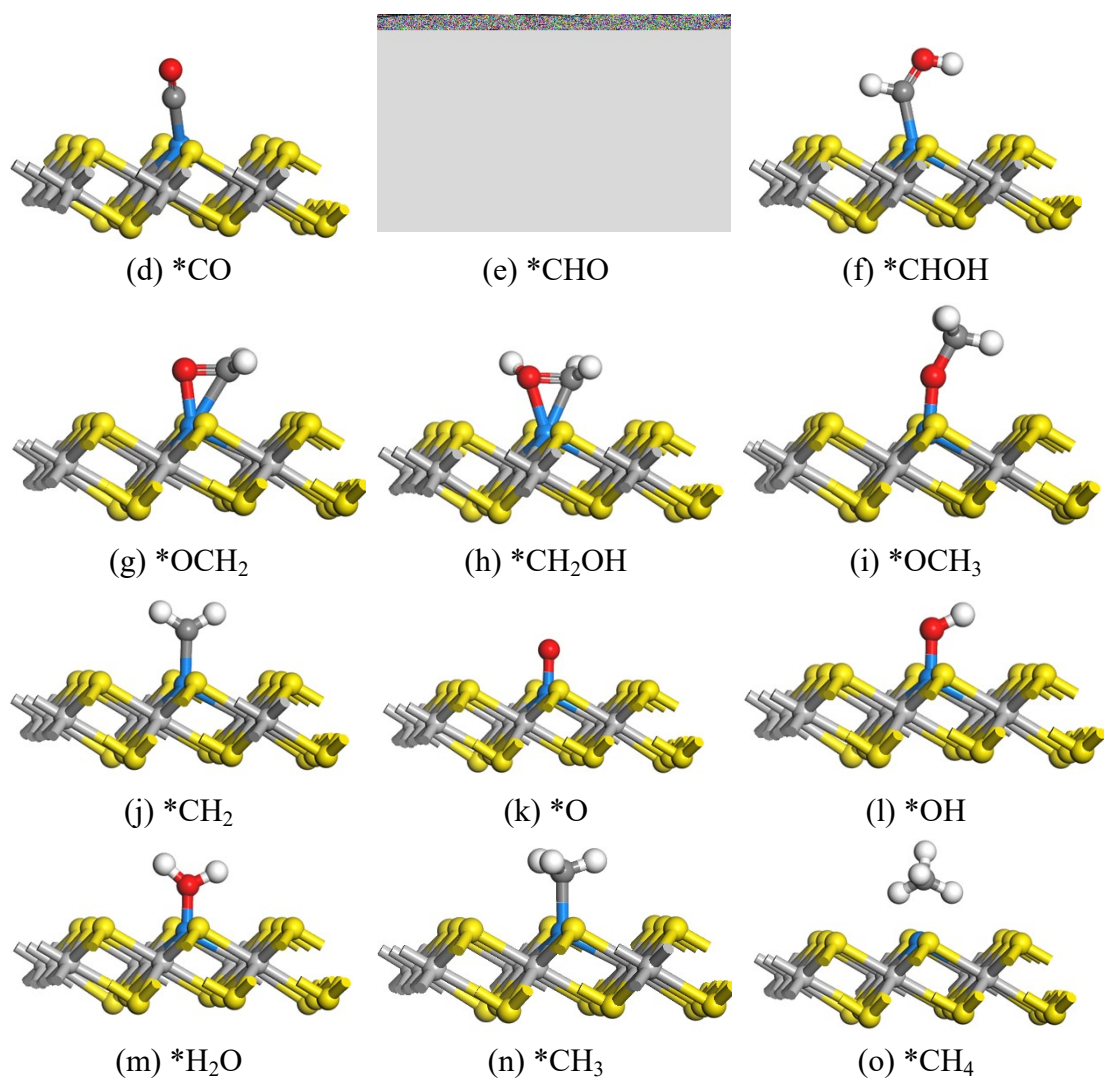

**Fig. S7** Optimized structures of the CO<sub>2</sub>RR involved intermediate species on V-PtS<sub>2</sub>.

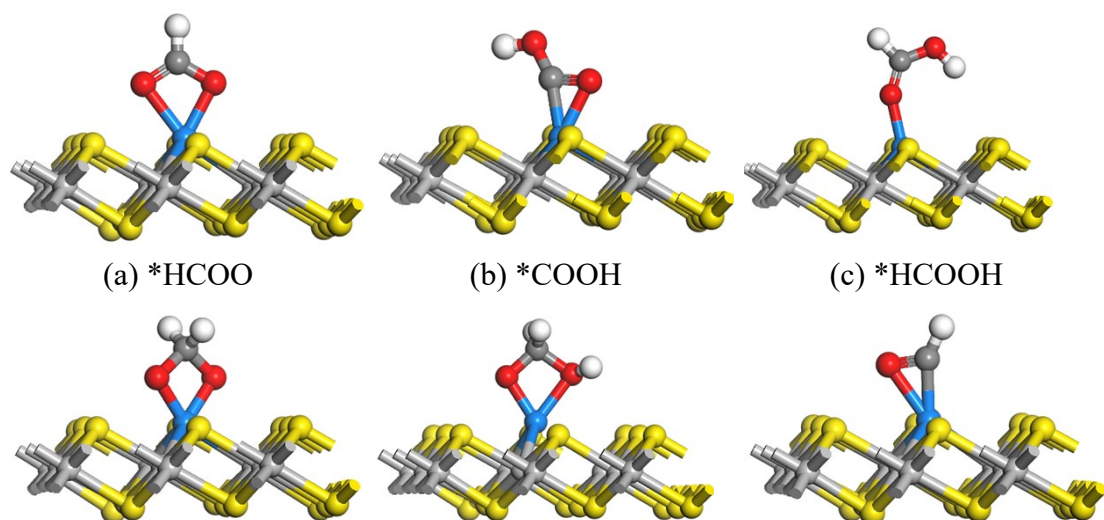

(d) \*H<sub>2</sub>COO

(e) \*H<sub>2</sub>COOH

(f) \*CHO

**Fig. S8** Optimized structures of the CO<sub>2</sub>RR involved intermediate species on Cr-PtS<sub>2</sub>.

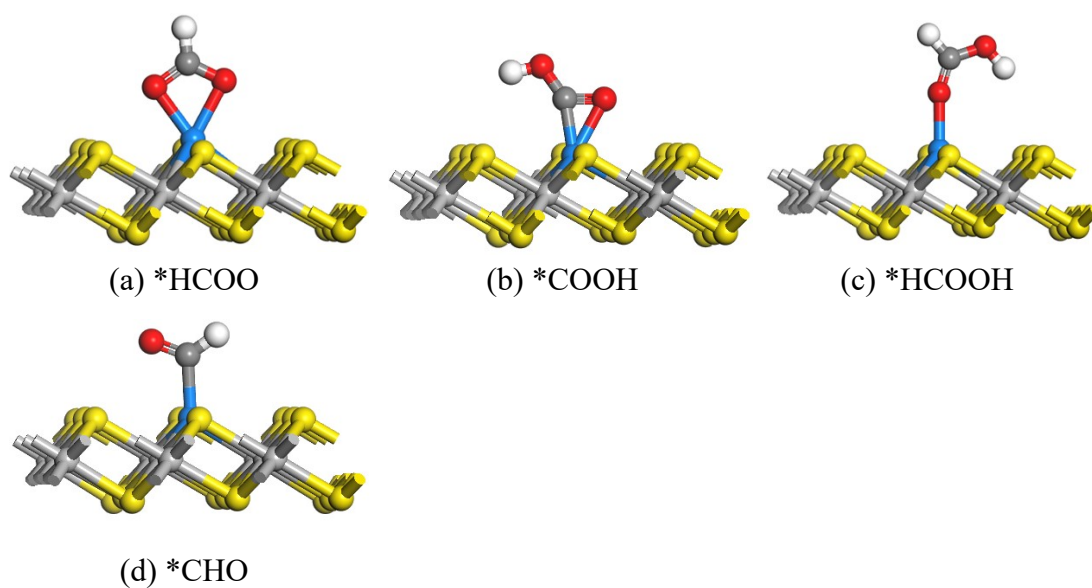

**Fig. S9** Optimized structures of the CO<sub>2</sub>RR involved intermediate species on Mn-PtS<sub>2</sub>.

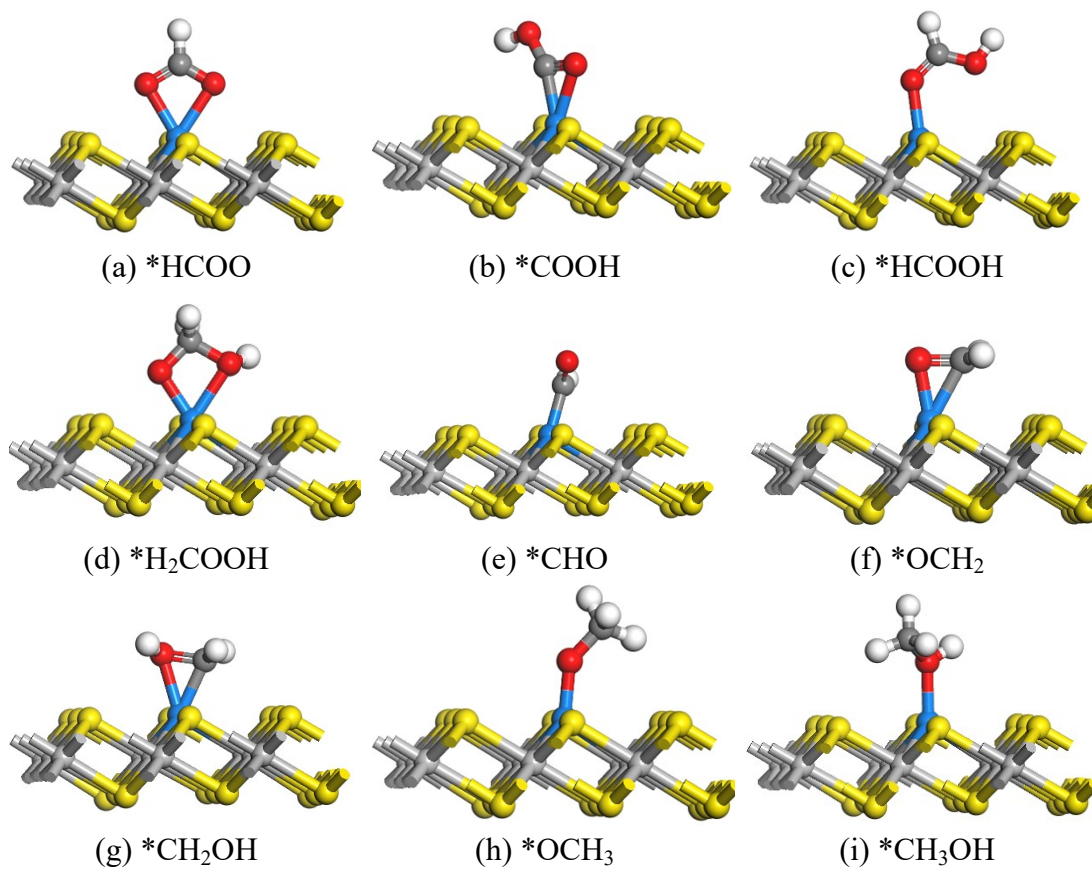



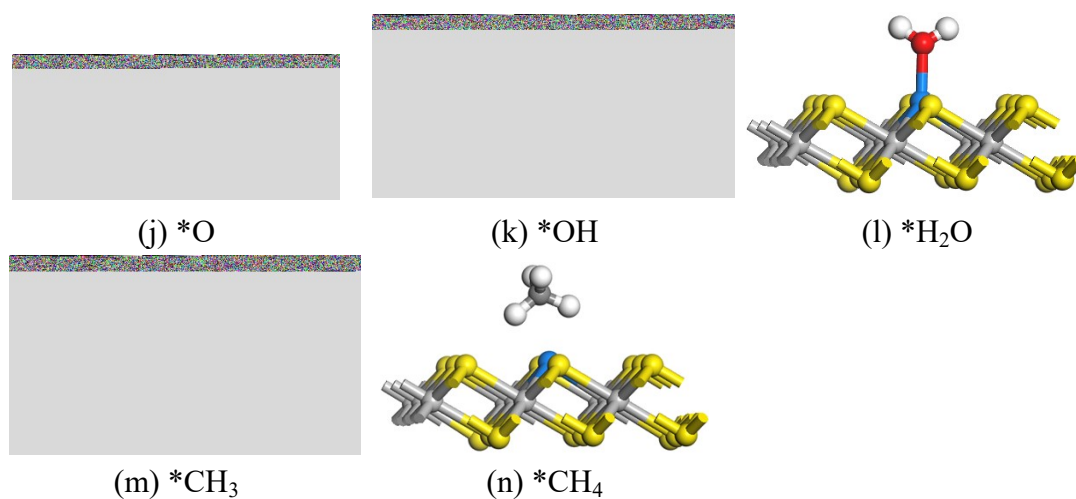

**Fig. S10** Optimized structures of the CO<sub>2</sub>RR involved intermediate species on FePt<sub>2</sub>.

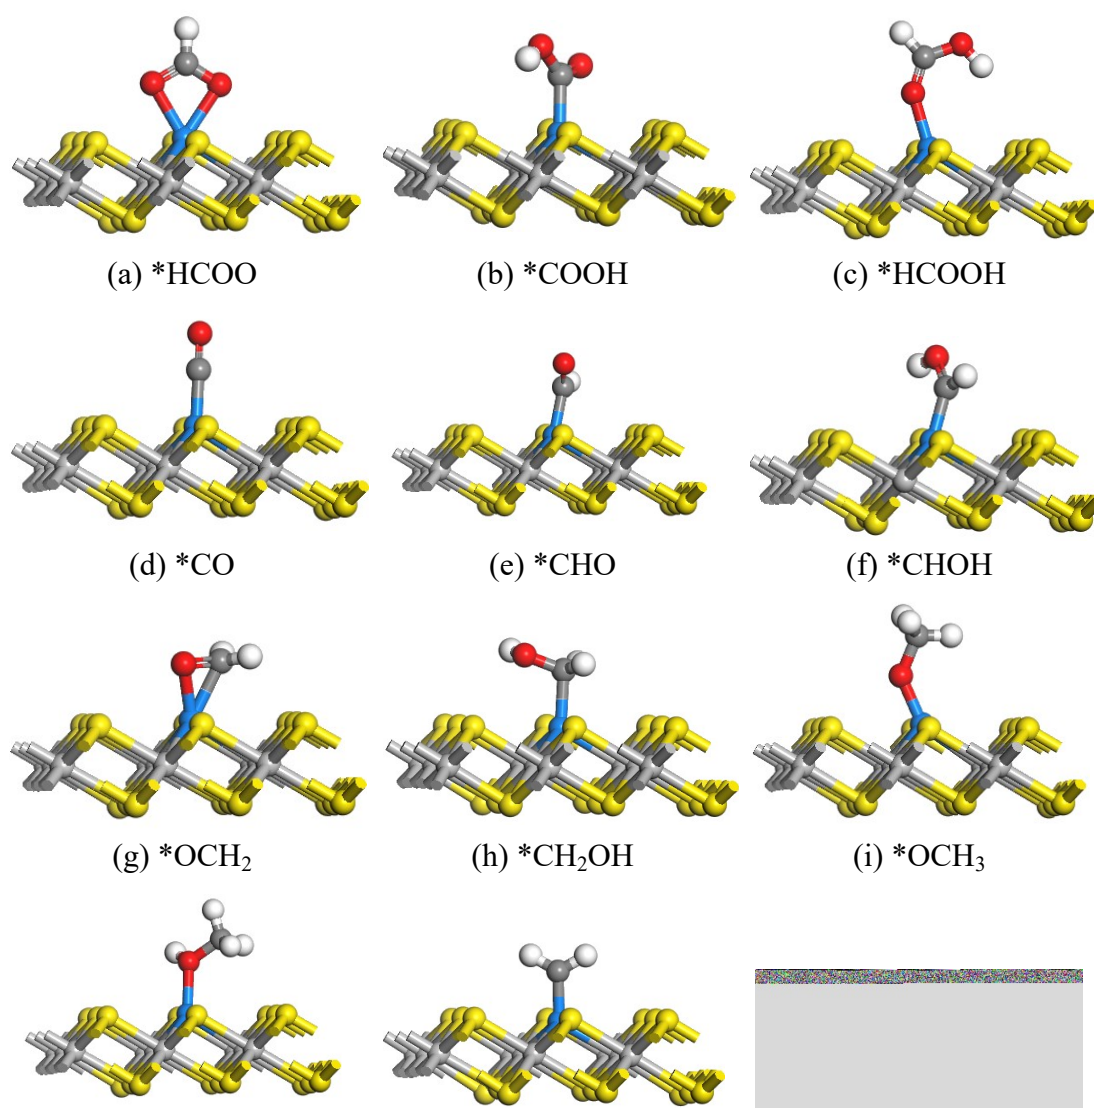

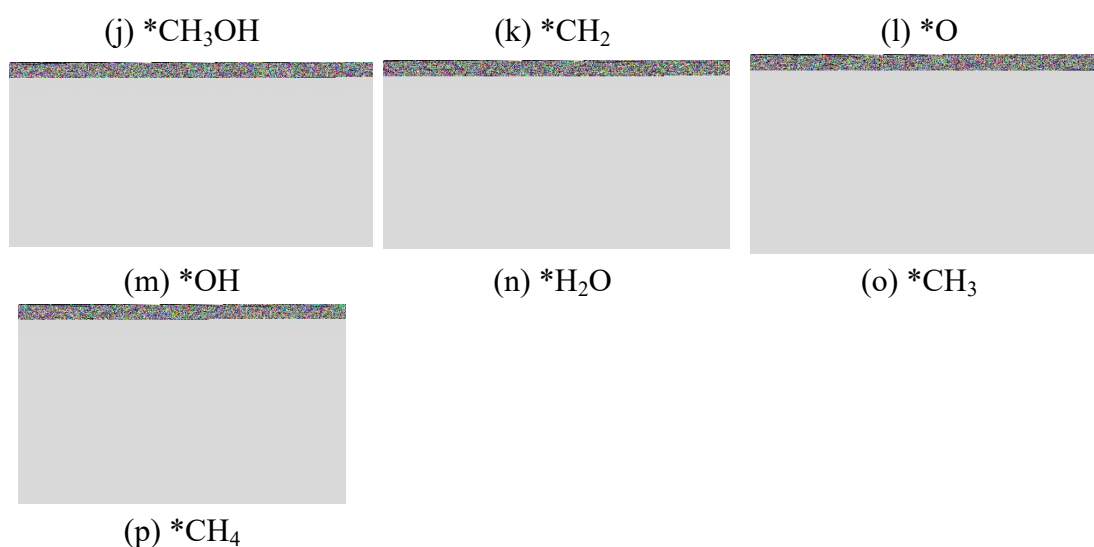

**Fig. S11** Optimized structures of the CO<sub>2</sub>RR involved intermediate species on CoPtS<sub>2</sub>.

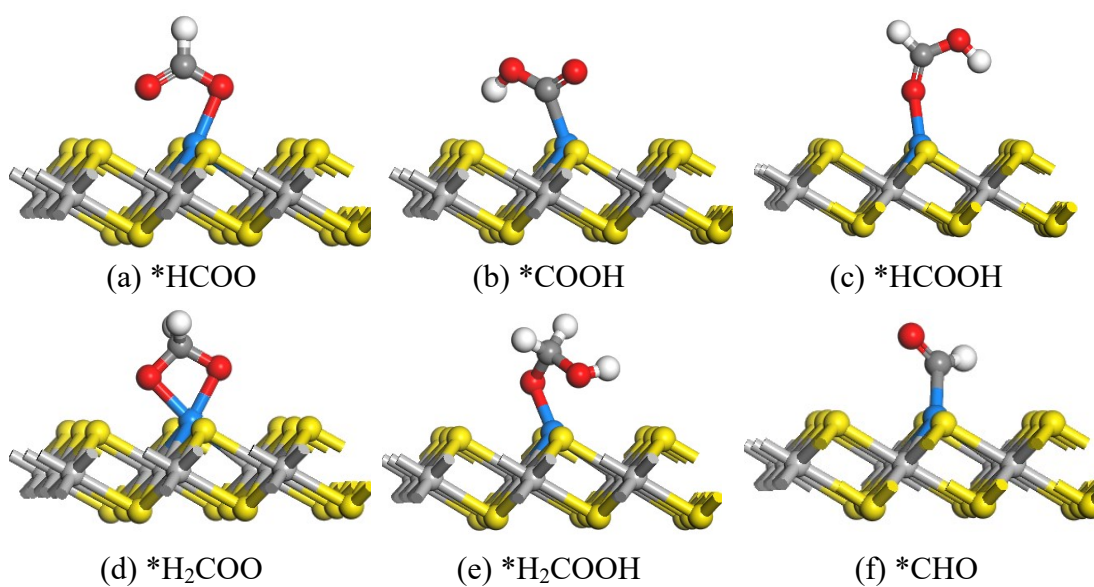

**Fig. S12** Optimized structures of the CO<sub>2</sub>RR involved intermediate species on NiPtS<sub>2</sub>.

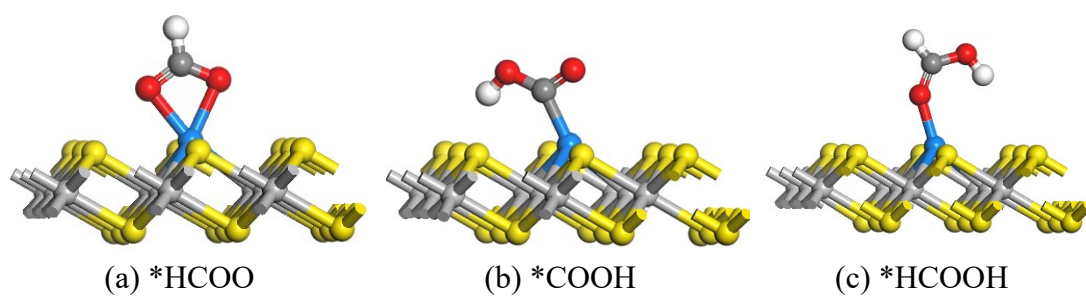

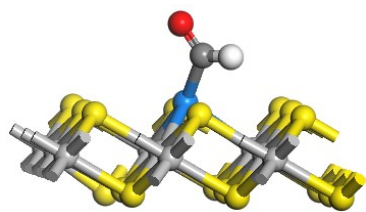

(d) \*CHO

**Fig. S13** Optimized structures of the CO<sub>2</sub>RR involved intermediate species on Cu-PtS<sub>2</sub>.

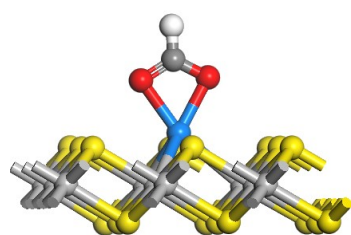

(a) \*HCOO

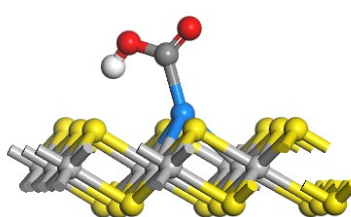

(b) \*COOH

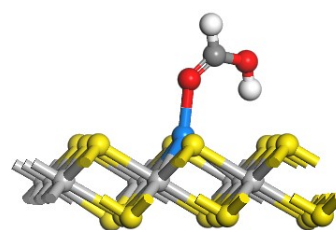

(c) \*HCOOH

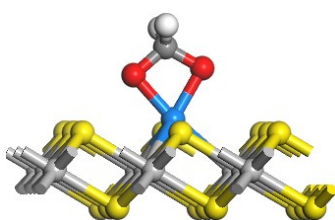

(d) \*H<sub>2</sub>COO

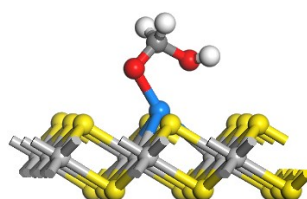

(e) \*H<sub>2</sub>COOH

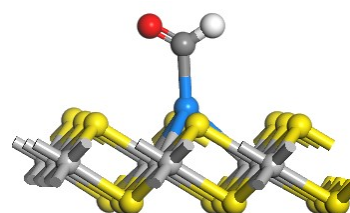

(f) \*CHO

**Fig. S14** Optimized structures of the CO<sub>2</sub>RR involved intermediate species on Zn-PtS<sub>2</sub>.

**Table S3** Potential determining steps (PDS) of C<sub>1</sub> products and limiting potentials ( $U_L$ , V) of CO<sub>2</sub>RR and HER on various TM-PtS<sub>2</sub> monolayers

| catalyst | PDS                         | $U_L(\text{CO}_2\text{RR})$ | $U_L(\text{HER})$ | $U_L(\text{HCOOH})$ | Product                             |
|----------|-----------------------------|-----------------------------|-------------------|---------------------|-------------------------------------|
|          |                             |                             |                   | $-U_L(\text{H}_2)$  |                                     |
| Sc       | *+CO <sub>2</sub> →*HCOO    | -0.24                       | -2.26             | 2.02                | HCOOH                               |
|          | *+CO <sub>2</sub> →*COOH    | -1.39                       |                   |                     | CO                                  |
|          | *HCOOH→*H <sub>2</sub> COOH | -0.86                       |                   |                     | CH <sub>4</sub> /CH <sub>3</sub> OH |
| Ti       | *+CO <sub>2</sub> →*HCOO    | -0.41                       | -1.86             | 1.45                | HCOOH                               |
|          | *+CO <sub>2</sub> →*COOH    | -1.42                       |                   |                     | CO                                  |
|          | *HCOOH→*CHO                 | -1.46                       |                   |                     | CH <sub>4</sub> /CH <sub>3</sub> OH |
| V        | *+CO <sub>2</sub> →*COOH    | -0.06                       | -0.63             | 0.57                | HCOOH                               |
|          | *COOH→*CO                   | -0.26                       |                   |                     | CO/CH <sub>3</sub> OH               |
|          | *OH→*H <sub>2</sub> O       | -0.46                       |                   |                     | CH <sub>4</sub>                     |
| Cr       | *+CO <sub>2</sub> →*HCOO    | -0.39                       | -1.29             | 0.90                | HCOOH                               |
|          | *+CO <sub>2</sub> →*COOH    | -0.79                       |                   |                     | CO                                  |
|          | *HCOOH→*CHO                 | -1.15                       |                   |                     | CH <sub>4</sub>                     |
| Mn       | *+CO <sub>2</sub> →*HCOO    | -0.74                       | -1.35             | 0.61                | HCOOH                               |
|          | *+CO <sub>2</sub> →*COOH    | -2.10                       |                   |                     | CO                                  |
|          | *HCOOH→*CHO                 | -0.88                       |                   |                     | CH <sub>4</sub> /CH <sub>3</sub> OH |
| Fe       | *HCOO→*HCOO                 | 0                           | -0.70             | 0.70                | HCOOH                               |
|          | *+CO <sub>2</sub> →*COOH    | -0.64                       |                   |                     | CO                                  |
|          | *HCOOH→*H <sub>2</sub> COOH | -0.32                       |                   |                     | *HCOOH→*H <sub>2</sub> COOH         |

|    |                             |       |       |      |                                           |
|----|-----------------------------|-------|-------|------|-------------------------------------------|
| Co | *+CO <sub>2</sub> →*HCOO    | -0.23 | -0.55 | 0.32 | HCOOH/CH <sub>4</sub> /CH <sub>3</sub> OH |
| Ni | *+CO <sub>2</sub> →*HCOO    | -0.72 | -0.95 | 0.23 | HCOOH/CH <sub>4</sub> /CH <sub>3</sub> OH |
| Cu | *+CO <sub>2</sub> →*HCOO    | -0.25 | -0.78 | 0.53 | HCOOH                                     |
|    | *+CO <sub>2</sub> →*COOH    | -0.98 |       |      | CO                                        |
|    | *HCOOH→*H <sub>2</sub> COOH | -0.76 |       |      | CH <sub>4</sub> /CH <sub>3</sub> OH       |
| Zn | *HCOO→*HCOOH                | -0.49 | -0.53 | 0.04 | HCOOH/CH <sub>4</sub> /CH <sub>3</sub> OH |
|    | *+CO <sub>2</sub> →*COOH    | -1.02 |       |      |                                           |

---
